# Supplementary material for: Effects of Nutritional Strategies on Glucose Homeostasis in Gestational Diabetes Mellitus: A Systematic Review and Network Meta-Analysis
Source: Hindawi journal article supplement (doi:10.1155/2020/6062478), 2020-02-25
Supplement: f1 [file 6062478.f1.pdf]

## Annex 1: Detailed search strategy

### PubMed

|                                                      |         |
|------------------------------------------------------|---------|
| #1 "Diabetes, Gestational"[Mesh]                     | 11560   |
| #2 Pregnancy-Induced Diabetes[Title/Abstract]        | 12      |
| #3 Gestational Diabetes Mellitus[Title/Abstract]     | 7574    |
| #4 GDM[Title/Abstract]                               | 6581    |
| #5 #1OR#2OR#3OR#4                                    | 14283   |
| #6 nutrient*[Title/Abstract]                         | 133504  |
| #7 nutrition[Title/Abstract])                        | 164036  |
| #8 dietary supplement[Title/Abstract])               | 5066    |
| #9 protein[Title/Abstract])                          | 2391555 |
| #10 amino acids[Title/Abstract])                     | 206866  |
| #11 fatty acids[Title/Abstract])                     | 132223  |
| #12 vitamin[Title/Abstract])                         | 192088  |
| #13 mineral[Title/Abstract])                         | 105366  |
| #14 antioxidant[Title/Abstract])                     | 163415  |
| #15 phytochemical[Title/Abstract]                    | 12190   |
| #16 #6OR#7OR#8OR#9OR#10OR#11OR#12OR#13OR#14OR#15     | 3188131 |
| #17 "Randomized Controlled Trial" [Publication Type] | 489079  |
| #18 controlled trial[Title/Abstract])                | 119968  |
| #19 clinical trial[Title/Abstract])                  | 134527  |
| #20 random*[Title/Abstract])                         | 1066592 |

#21 RCT[Title/Abstract] 20238  
#22 #17OR#18OR#19OR#20OR#21 1257451  
#23 #5 AND #16 AND #22 226

## Cochrane

#1 MeSH descriptor:[diabetes, gestational] explode all trees 795  
#2 pregnancy-induced diabetes :ab,ti,kw 123 in trials to July 2019  
#3 gestational diabetes mellitus :ab,ti,kw 2068 in trials to July 2019  
#4 GDM:ab,ti,kw 1101 in trials to July 2019  
#5 #1OR#2OR#3OR#4 2348 in trials to July 2019  
#6 nutrient\*:ab,ti,kw 5970 in trials to July 2019  
#7 nutrition:ab,ti,kw 21828 in trials to July 2019  
#8 dietary supplement:ab,ti,kw 5555 in trials to July 2019  
#9 protein:ab,ti,kw 68303 in trials to July 2019  
#10 amino acids:ab,ti,kw 4550 in trials to July 2019  
#11 fatty acids:ab,ti,kw 12410 in trials to July 2019  
#12 vitamin:ab,ti,kw 25972 in trials to July 2019  
#13 mineral:ab,ti,kw 11454 in trials to July 2019  
#14 antioxidant:ab,ti,kw 9418 in trials to July 2019  
#15 phytochemical:ab,ti,kw 147 in trials to July 2019  
#16 #6OR#7OR#8OR#9OR#10OR#11OR#12OR#13OR#14OR#15 135166 in  
trials to July 2019

#17 #5AND#16 513 in trials

## EMbases

#1 diabetes, gestational /exp 33396

#2 pregnancy-induced diabetes :ab,ti 14

#3 gestational diabetes mellitus :ab,ti 10328

#4 GDM:ab,ti 10641

#5 #1OR#2OR#3OR#4 34605

#6 nutrient\*:ab,ti 155386

#7 nutrition:ab,ti 195429

#8 dietary supplement:ab,ti 6344

#9 protein:ab,ti 2800622

#10 amino acids:ab,ti 209001

#11 fatty acids:ab,ti 148986

#12 vitamin:ab,ti 229764

#13 mineral:ab,ti 132889

#14 antioxidant:ab,ti 209001

#15 phytochemical:ab,ti 24172

#16#6OR#7OR#8OR#9OR#10OR#11OR#12OR#13OR#14OR#15 3634797

#17 controlled trial:ab,ti 153510

#18 clinical trial:ab,ti 185807

#19 random\*:ab,ti 1420533

#20 RCT:ab,ti 33205

#21 #17OR#18OR#19OR#20 1535946

#22 #5 AND #16 AND #21 382
